# Supplementary material for: A spirobifluorene-based water-soluble imidazolium polymer for luminescence sensing
Source: Royal Society of Chemistry journal article supplement (doi:10.1039/d1nj02358f), 2021-01-01
Supplement: d1nj02358f1.pdf [file d1nj02358f1.pdf]

## Electronic Supplementary Information

### Spirobifluorene-based water-soluble imidazolium polymer for luminescent sensing

Caifeng Wei, Jinyi Wu, Xiyong Feng, Zujin Yang,\* , Jianyong Zhang,\* Hongbing Ji\*

*Sun Yat-Sen University, School of Chemical Engineering and Technology, MOE Laboratory of Polymeric Composite and Functional Materials, School of Materials Science and Engineering, Guangzhou 510275, China.*

## Materials and methods

$^1\text{H}$  NMR was measured on a Bruker AVANCE III 400 spectrometer at ambient temperature.  $^{13}\text{C}$  NMR was measured on a Bruker Avance III 500HD spectrometer at ambient temperature. Solid-state  $^{13}\text{C}$  CP/MAS NMR spectrum was measured on a Bruker AVANCE 400 spectrometer. Fourier transform infrared spectroscopy (FT-IR) was recorded on KBr pellets by a NICOLET 6700 FT-IR instrument in the region 4000-400  $\text{cm}^{-1}$ . Scanning electron microscopy (SEM) was performed on SU8010 operated at an accelerating voltage of 5.0 kV. X-ray diffraction (XRD) patterns were collected on the D-MAX 2200 VPC using Cu radiation source at 40 kV and 26 mA, from 5 to 80  $^\circ\text{C}$  with a scan rate of 8.0  $^\circ\text{C s}^{-1}$ . Thermogravimetric analysis (TGA) was carried out with a TG-209/Vector-22 instrument in nitrogen atmosphere at a heating rate of 10  $^\circ\text{C min}^{-1}$ . Liquid UV-Vis spectroscopic analyses were performed on a RIGOL Ultra-3660 spectrophotometer. Dynamic light scattering (DLS) was measured on an EliteSizer Brookhaven instruments at ambient temperature in the solvent of  $\text{H}_2\text{O}$ .  $\text{N}_2$  adsorption isotherms were measured at 77 K using an automated Micromeritics ASAP 2460 surface area and porosimetry system, and the sample was degassed at 100 $^\circ\text{C}$  for 10 h in vacuum before analysis. The surface area was calculated using the Brunauer-Emmett-Teller (BET) method and the pore size distribution was determined by NLDFT method. The fluorescence excitation and emission spectra were performed on a FLSP920 instrument at room temperature. The electrochemical measurement was performed at room temperature using a typical three-electrode cell controlled by a CHI 660E electrochemical workstation.

Quantum yield of IMSPF-Br-COOH in solution was calculated according to the following equation:

$$\varphi = \frac{n^2 A_s D}{n_s^2 A D_s} \varphi_s \quad (\varphi_s = 0.55, A, A_s \leq 0.05)$$

where  $\varphi$  is fluorescence quantum yield,  $A$  is the absorbance,  $n$  is the refractive index of the solution, and  $D$  is the corrected fluorescence emission spectral integral area. Excitation was chosen at 333 nm,  $n = n_s$ . The subscript "s" refers to the reference fluorophore, quinine sulfate dihydrate dissolved in dilute sulphuric acid (quantum yield,  $\varphi_s = 0.55$ ).

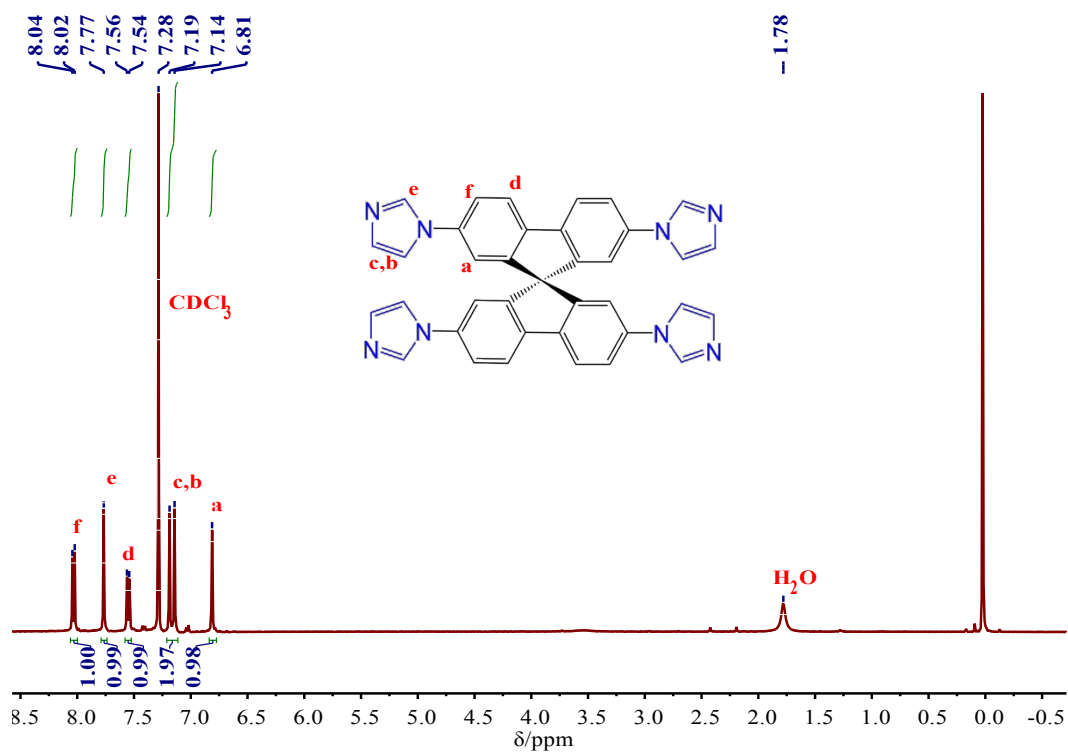

**Fig. S1**  $^1\text{H}$  NMR spectrum of IMSPF (400 MHz,  $\text{CDCl}_3$ ).

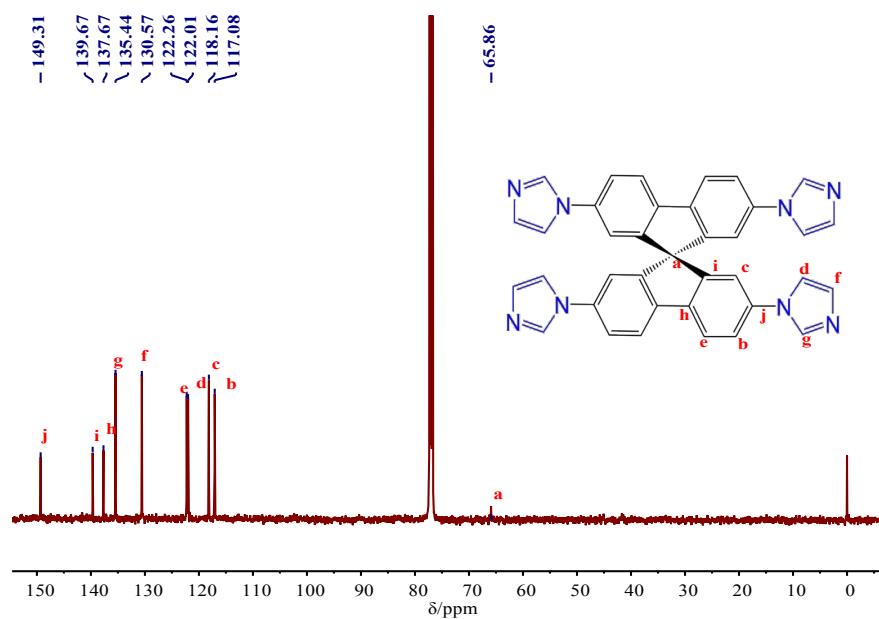

**Fig. S2**  $^{13}\text{C}$  NMR spectrum of IMSPF (125 MHz,  $\text{CDCl}_3$ ).

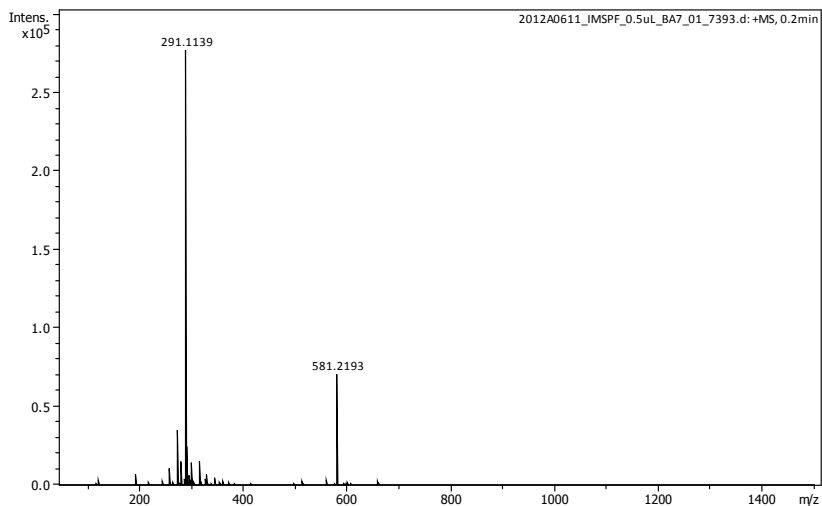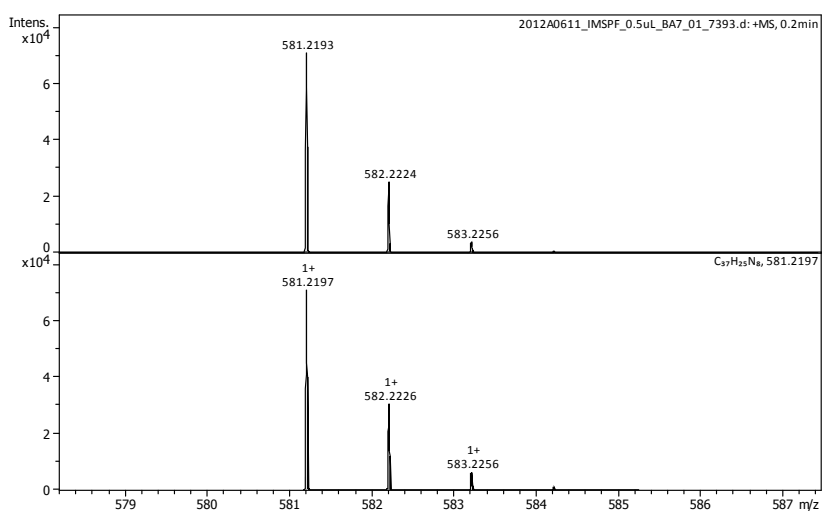

**Fig. S3** ESI-TOF-MS spectra of IMSPF:  $m/z$  found (calcd.) for  $[C_{37}H_{25}N_8]^+$ , 581.2193 (581.2197).

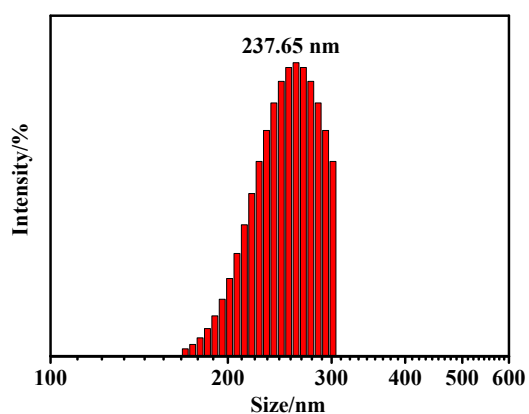

**Fig. S4** Dynamic light scattering analysis of the aqueous solution of IMSPF-Br-COOH ( $0.4 \text{ mg mL}^{-1}$ ).

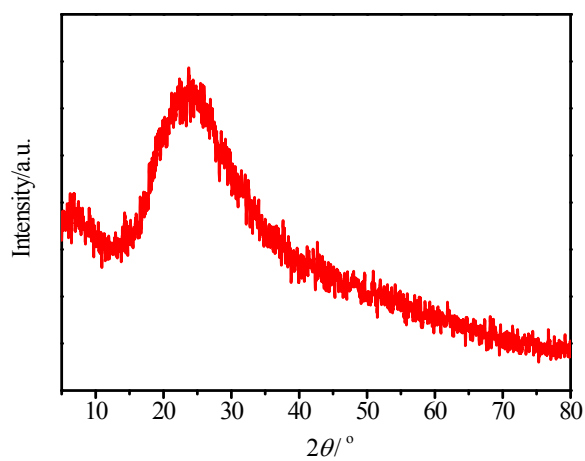

**Fig. S5** Powder X-ray diffraction pattern of IMSPF-Br-COOH.

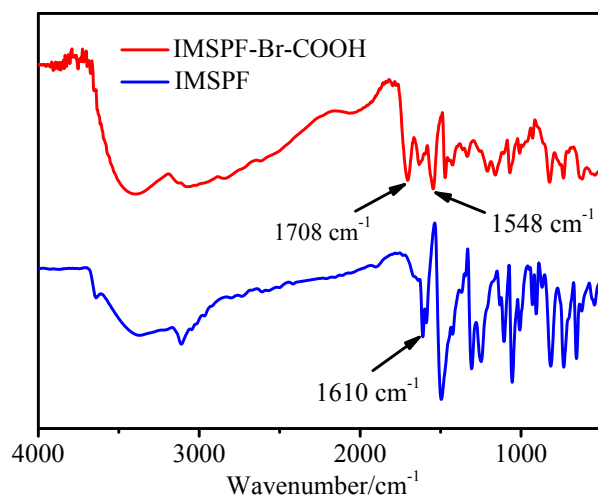

**Fig. S6** FT-IR spectra of IMSPF-Br-COOH and IMSPF.

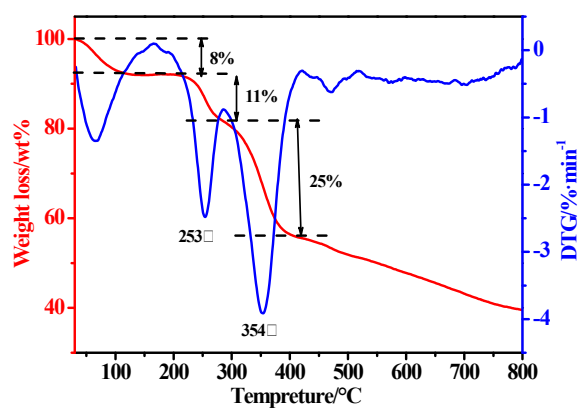

**Fig. S7** Thermogravimetric analysis (TGA) curves of IMSPF-Br-COOH under  $N_2$  atmosphere.

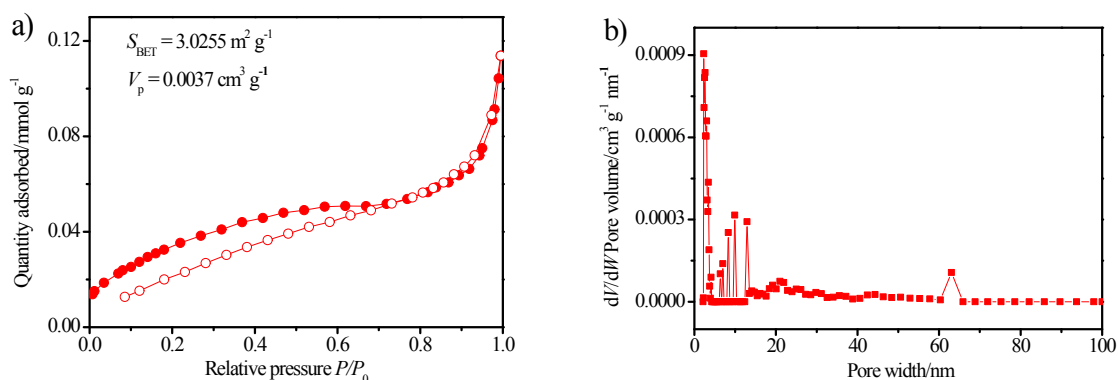

**Fig. S8** N<sub>2</sub> adsorption-desorption isotherms and NLDTF pore size distributions of IMSPF-Br-COOH.

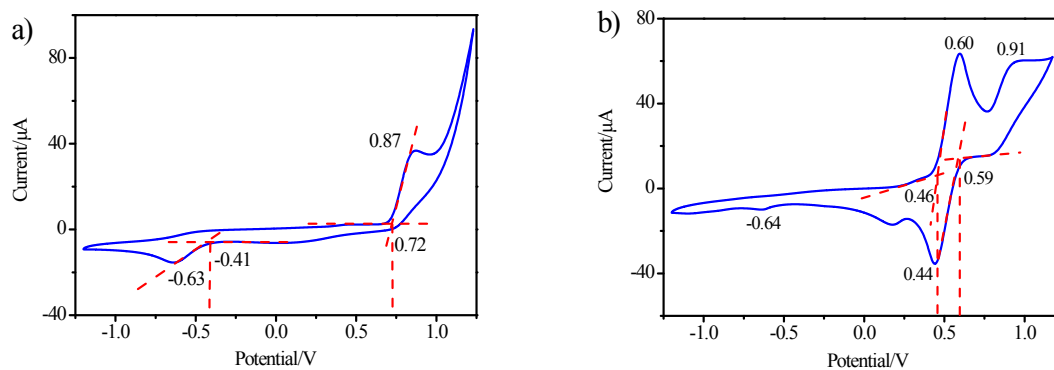

**Fig. S9** Cyclic voltammetry of (a) IMSPF-Br-COOH, and (b) IMSPF-Br-COOH using ferrocene as internal reference in 0.1 mol L<sup>-1</sup> Bu<sub>4</sub>NPF<sub>6</sub> in anhydrous DMSO with a scan rate of 0.05 V s<sup>-1</sup>.

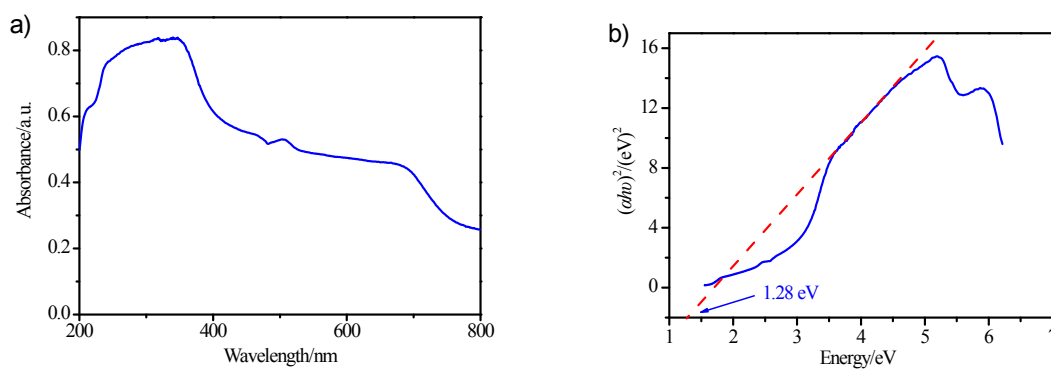

**Fig. S10** (a) UV-visible diffuse reflectance spectrum, and (b) Tauc plot of IMSPF-Br-COOH.

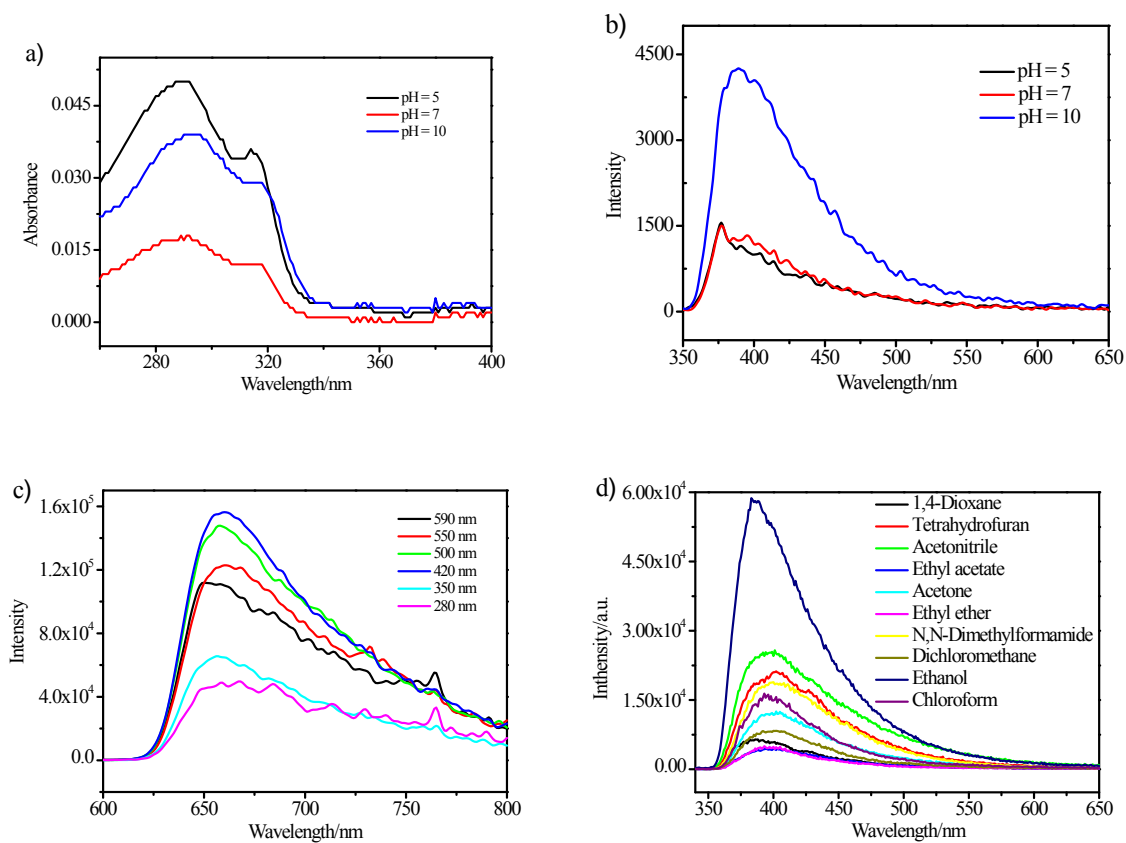

**Fig. S11** (a) UV-visible spectra of IMSPF-Br-COOH ( $7.83 \times 10^{-4}$  mg mL<sup>-1</sup>) in water, (b) fluorescence spectra of IMSPF-Br-COOH ( $7.83 \times 10^{-4}$  mg mL<sup>-1</sup>) in water, (c) solid-state fluorescence spectra of IMSPF-Br-COOH with different excitation wavenumbers, (d) fluorescence spectra of IMSPF-Br-COOH in various solvents.

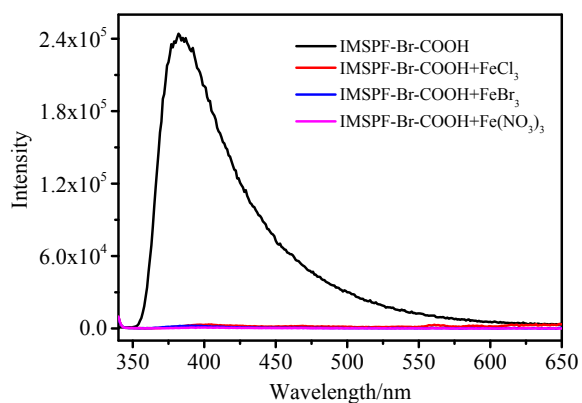

**Fig. S12** Emission spectra of the IMSPF-Br-COOH aqueous solution upon addition of FeCl<sub>3</sub>, FeBr<sub>3</sub> and Fe(NO<sub>3</sub>)<sub>3</sub> (0.40 mg mL<sup>-1</sup> IMSPF-Br-COOH was dispersed in H<sub>2</sub>O containing FeCl<sub>3</sub>, FeBr<sub>3</sub> or Fe(NO<sub>3</sub>)<sub>3</sub> solutions with a concentration of  $1.0 \times 10^{-2}$  mol L<sup>-1</sup>).

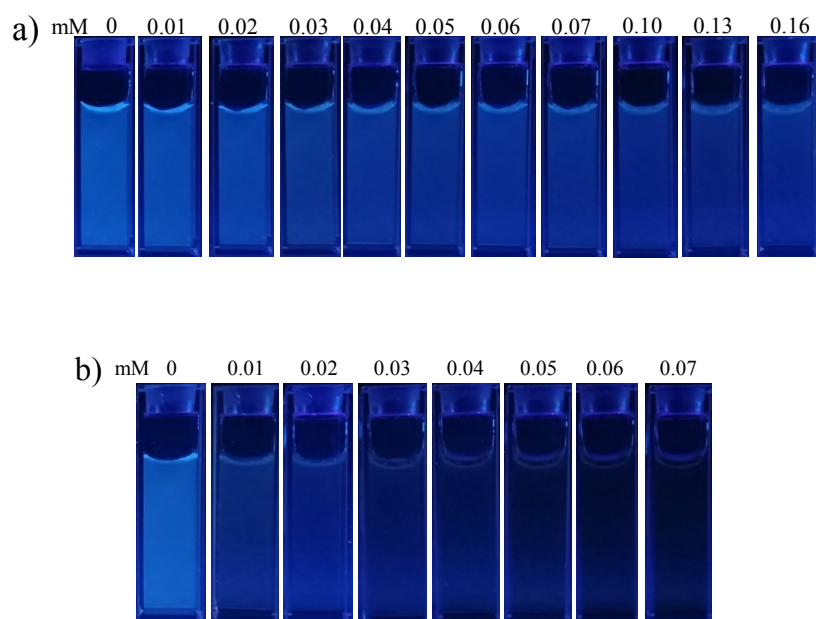

**Fig. S13** Fluorescence changes of the IMSPF-Br-COOH aqueous solution with various ion concentrations, (a) Fe<sup>3+</sup> (from left to right, the concentrations are 0, 0.01, 0.02, 0.03, 0.04, 0.05, 0.06, 0.07, 0.10, 0.13, 0.16 mmol L<sup>-1</sup>), and (b) Cr<sub>2</sub>O<sub>7</sub><sup>2-</sup> (from left to right, the concentrations are 0, 0.01, 0.02, 0.03, 0.04, 0.05, 0.06, 0.07 mmol L<sup>-1</sup>).



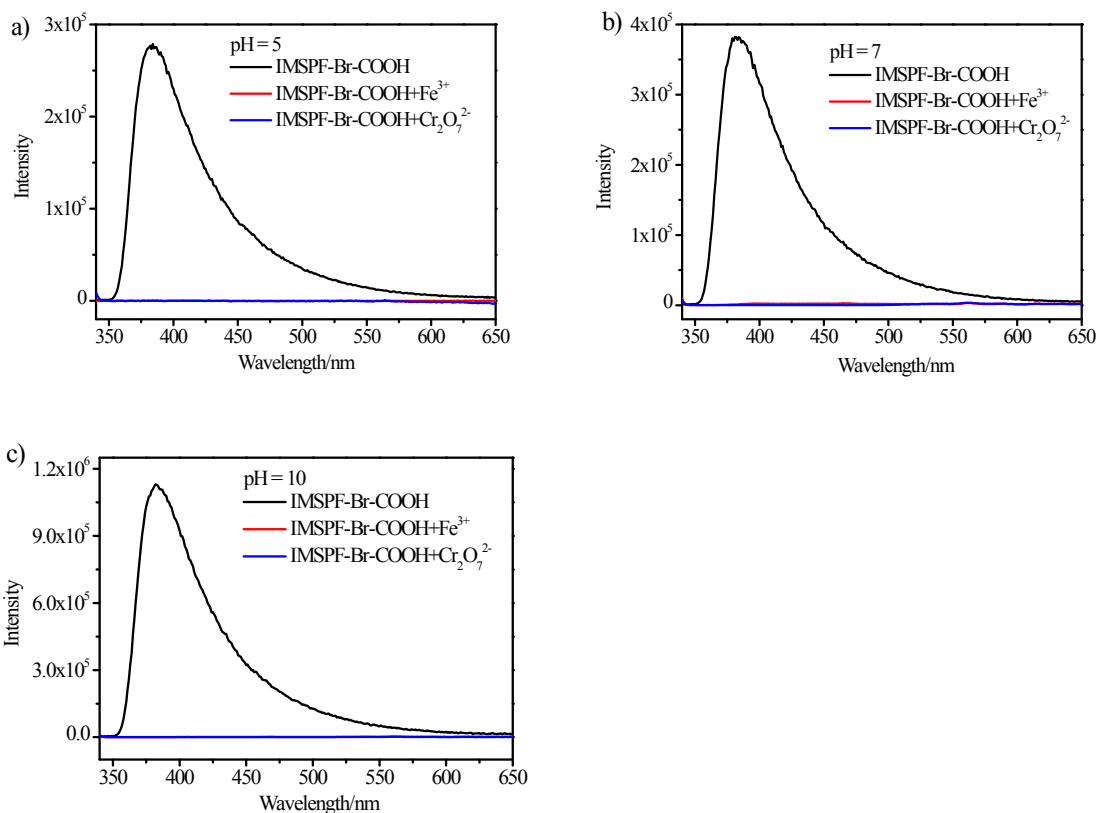

**Fig. S14** Emission spectra of the IMSPF-Br-COOH aqueous solution upon addition of Fe<sup>3+</sup> or Cr<sub>2</sub>O<sub>7</sub><sup>2-</sup> at various pH, a) pH = 5, b) pH = 7, and c) pH = 10 (0.40 mg mL<sup>-1</sup> of IMSPF-Br-COOH aqueous solution containing FeCl<sub>3</sub> or K<sub>2</sub>Cr<sub>2</sub>O<sub>7</sub> solution with a concentration of  $1.0 \times 10^{-2}$  mol L<sup>-1</sup>).

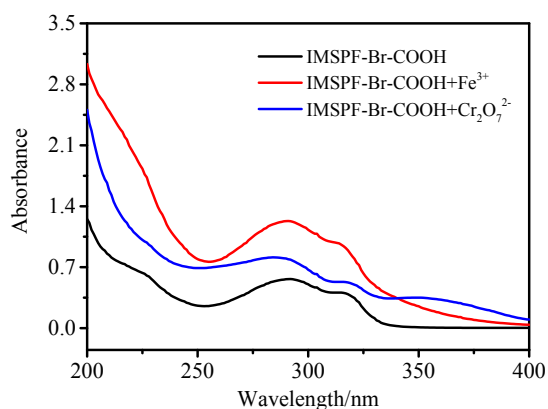

**Fig. S15** UV-vis absorption of IMSPF-Br-COOH aqueous solution, IMSPF-Br-COOH+Fe<sup>3+</sup> and IMSPF-Br-COOH+ Cr<sub>2</sub>O<sub>7</sub><sup>2-</sup> (0.40 mg mL<sup>-1</sup> of IMSPF-Br-COOH aqueous solution containing FeCl<sub>3</sub> or K<sub>2</sub>Cr<sub>2</sub>O<sub>7</sub> solution with a concentration of  $1.0 \times 10^{-2}$  mol L<sup>-1</sup>).

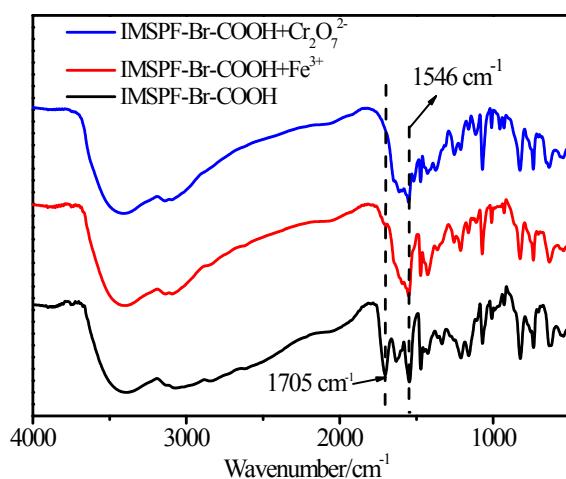

**Fig. S16** FT-IR spectra of IMSPF-Br-COOH, IMSPF-Br-COOH+Fe<sup>3+</sup> and IMSPF-Br-COOH+Cr<sub>2</sub>O<sub>7</sub><sup>2-</sup>. (IMSPF-Br-COOH was dispersed in ethanol, and then Fe<sup>3+</sup> or Cr<sub>2</sub>O<sub>7</sub><sup>2-</sup> was added. The mixture was stirred for 12 h and filtered to obtain IMSPF-Br-COOH+Fe<sup>3+</sup> or IMSPF-Br-COOH+Cr<sub>2</sub>O<sub>7</sub><sup>2-</sup>).

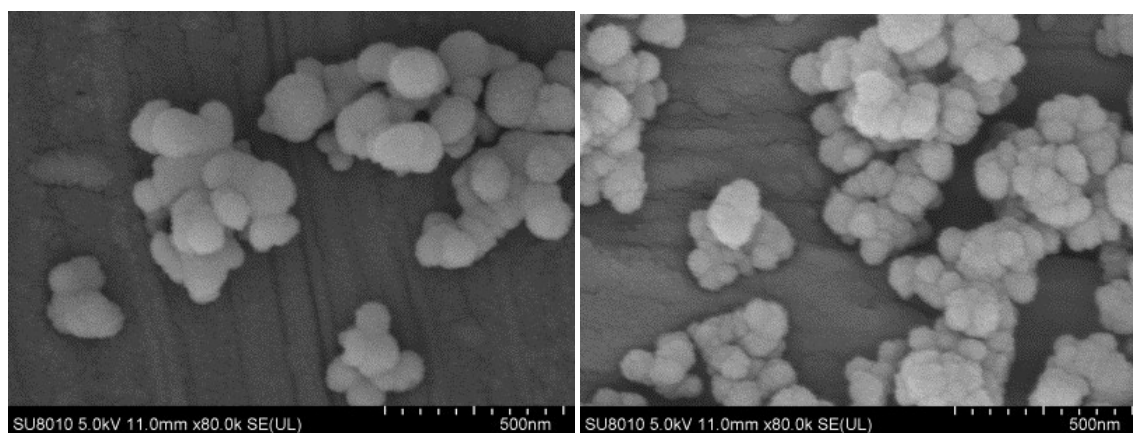

**Fig. S17** SEM images of (a) IMSPF-Br-COOH+Fe<sup>3+</sup>, and (b) IMSPF-Br-COOH+Cr<sub>2</sub>O<sub>7</sub><sup>2-</sup>. (IMSPF-Br-COOH was dispersed in ethanol, and then Fe<sup>3+</sup> or Cr<sub>2</sub>O<sub>7</sub><sup>2-</sup> was added. The mixture was stirred for 12 h and filtered to obtain IMSPF-Br-COOH+Fe<sup>3+</sup> or IMSPF-Br-COOH+Cr<sub>2</sub>O<sub>7</sub><sup>2-</sup>).
